# Supplementary material for: Enhancement of Antiviral CD8+ T-Cell Responses and Complete Remission of Metastatic Melanoma in an HIV-1-Infected Subject Treated with Pembrolizumab
Source: PubMed Central journal article supplement (PMC6947580; doi:10.3390/jcm8122089), 2019-12-01
Supplement: jcm-08-02089-s001.pdf [file jcm-08-02089-s001.pdf]

### Fig.1 Supplementary

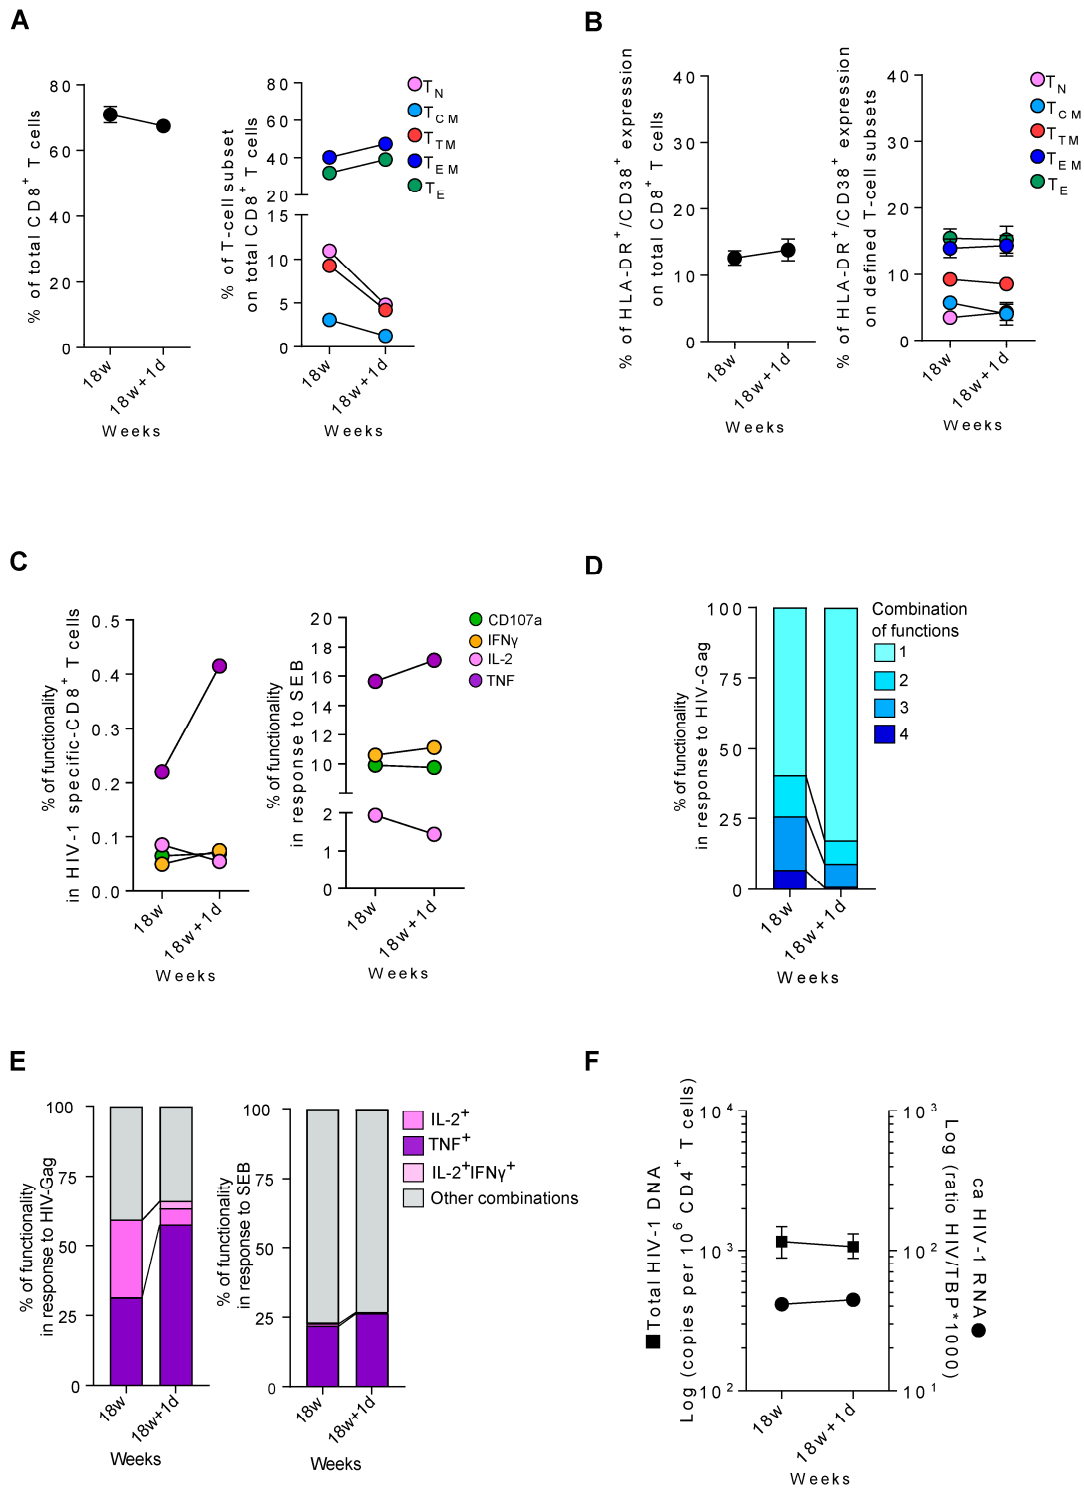

**Figure S1.** Immunophenotype of the HIV-1 specific-CD8<sup>+</sup> T-cell response after 24h of pembrolizumab administration from week 18 (w18+1). (A) Changes in total CD8<sup>+</sup> T-cell population (left graph) and, in CD8<sup>+</sup> T-cell subsets (right graph) after 24h from the administration at week 18. T<sub>N</sub>, naïve; T<sub>CM</sub>, central memory; T<sub>TM</sub>, transitional memory; T<sub>EM</sub>, effector memory; T<sub>E</sub>, effector; (B) The graphs represent the changes in total CD8<sup>+</sup> T cells expressing HLA-DR<sup>+</sup>/CD38<sup>+</sup> (left graph) and, in CD8<sup>+</sup> T-cell subsets (right graph). T<sub>N</sub>, naïve; T<sub>CM</sub>, central memory; T<sub>TM</sub>, transitional memory; T<sub>EM</sub>, effector memory; T<sub>E</sub>, effector; (C) Changes of TNF,

IFN $\gamma$ , CD107a and, IL-2 expression for HIV-1 specific-CD8<sup>+</sup> T cells in response to HIV-Gag (left graph) and in response to SEB (right graph); **(D)** Frequency of TNF $\alpha$ , IFN $\gamma$ , CD107a and, IL-2 combinations expressing 1, 2, 3 or 4 cytokines in total HIV-1 specific-CD8<sup>+</sup> T cells; **(E)** Detailed poly-functional profiles of HIV-1 specific-CD8<sup>+</sup> T cells. The bars in purple represent the changes on TNF frequency and in pink it is represented the changes of IL-2<sup>+</sup> and IL-2<sup>+</sup>IFN $\gamma$ <sup>+</sup>. **(F)** Total HIV-1 DNA (squares) and cell-associated HIV-1 RNA (circles) in CD4<sup>+</sup> T cells at week 18+1.
